# Supplementary material
Source: publisher figshare collection journal article supplement (https://acs.figshare.com/ndownloader/files/4617445)

## Supporting Information

*Simulations of equilibrium and non-equilibrium mechanisms and analysis using third-order correlation functions.* A simple cyclic mechanism was used to simulate channels that alternate between bursting and non-bursting states (**Figure S2**). Detailed balance violations can be introduced by changing the relative values of rate constants. Rate constants were as follows (sec<sup>-1</sup>):  $k_{b1}, k_{1b}, k_{b3}, k_{3b} = 1000$ ,  $k_{12}, k_{23} = 10$ ,  $k_{34}, k_{41} = 1$ , and  $k_{14}, k_{43}, k_{32}, k_{21} = 0.001$  for an irreversible mechanism (**Figure S2a**) and  $k_{14}, k_{43} = 1$  and  $k_{32}, k_{21} = 10$  for a reversible mechanism (**Figure S1b**). In the non-equilibrium mechanism, excursions through the  $O_1 \rightarrow C_2 \rightarrow O_3 \rightarrow C_4$  cycle will be exclusively clockwise. Third-order correlation functions ( $G_2 - G_2^T$ ) of simulated records from non-equilibrium and equilibrium mechanisms are shown in **Figure S3a** and **Figure S3b**, respectively.

Higher-order correlation analysis can be used to test for microscopic reversibility in single-molecule systems.<sup>1,2</sup> In practice, however, this analysis requires that fluctuations in the signal are relatively large compared to the mean. When the number of channels and/or the open probability is sufficiently high, random variation in  $G_2$  will be large proportional to the mean compared to  $G_2 - G_2^T$ . Thus, microscopic reversibility violations will not be detectable even if they are present.

To determine the lower limit of  $(G_2 - G_2^T) / G_2$  for which violations of microscopic reversibility are still detectable, simulations of equilibrium and non-equilibrium mechanisms of ~100 sec (similar to experimental records) were carried out, and third-order correlation functions were determined for channel activity averaged over 100 ms. For  $(G_2 - G_2^T) / G_2 \geq \sim 0.1$ , the

reversible and irreversible records were distinguishable. Therefore, experimental records meeting this condition were compared.

*Kinetic identifiability in detection of microscopic reversibility violations.* For ion channel systems that lack subconductance states (conformations with conductance intermediate between open and closed), distinguishing between equilibrium and non-equilibrium mechanisms can be difficult. Irreversible transitions may not be detected if they connect states that cannot be distinguished. However, kinetic criteria are also valid for identifying states.

A cyclic mechanism with three different bursting states (**Figure S4a**) provides an example of a mechanism that contains kinetically identifiable states. For this mechanism, the bursting states differ in their opening rate constants, and are linked by irreversible transitions. Rate constants are as follows ( $\text{sec}^{-1}$ ):  $k_{12}, k_{23}, k_{31} = 1$ ,  $k_{13}, k_{32}, k_{21} = 0.001$ ,  $k_{41}, k_{52}, k_{63} = 1000$ ,  $k_{14} = 100$ ,  $k_{25} = 400$ , and  $k_{36} = 1600$ . Simulations indicate that the open probability varies in a regular, cyclic fashion; open probabilities shift from low to medium to high, and then back to low (**Figure S4b**). The third-order correlation function calculated from this record (averaged over 50 ms windows) is asymmetric (**Figure S4c**). Thus, even though this mechanism contains only two classes of conductance states (open and closed), the kinetic identifiability of states allows violations of microscopic reversibility to be observed. A similar result is observed when only two of the bursting states exhibit different open probabilities, i.e.,  $k_{14} = k_{25} = 400 \text{ sec}^{-1}$  and  $k_{36} = 1600 \text{ sec}^{-1}$ . (**Figure S5**).

In contrast, violations of microscopic reversibility are not detectable for a non-equilibrium cyclic mechanism in which the bursting states have identical kinetic properties, i.e.,  $k_{14} = k_{25} = k_{36} = 400 \text{ sec}^{-1}$ . Simulations of this mechanism indicate that the open probability does not vary

with time (**Figure S6a**), and the third-order correlation function is symmetric (**Figure S6b**). In this case, there are not enough kinetically identifiable states for microscopic reversibility violations to be detected.

These simulations illustrate that a channel with only two conductance states may still have a sufficient number of kinetically identifiable states to detect violations of microscopic reversibility. However, a non-equilibrium process may not exhibit observable violations of microscopic reversibility due to a lack of kinetically identifiable states as shown in present simulations. As for other tests of microscopic reversibility, the absence of detectable microscopic reversibility violations thus does not rule out a non-equilibrium mechanism. Nonetheless, the detection of microscopic reversibility violations indicates that a sufficient number of kinetically identifiable states are present, and channel gating is not an equilibrium process.

## References

- (1) Steinberg, I. Z. *Biophysical Journal* **1986**, *50*, 171.
- (2) Qian, H.; Elson, E. L. *Proc Natl Acad Sci U S A* **2004**, *101*, 2828.

**Figure S1. Third-order correlation function of experimental records from  $K_{ATP}$  channels.**

Numbers in the bar indicate the amplitude of third-order correlation functions.

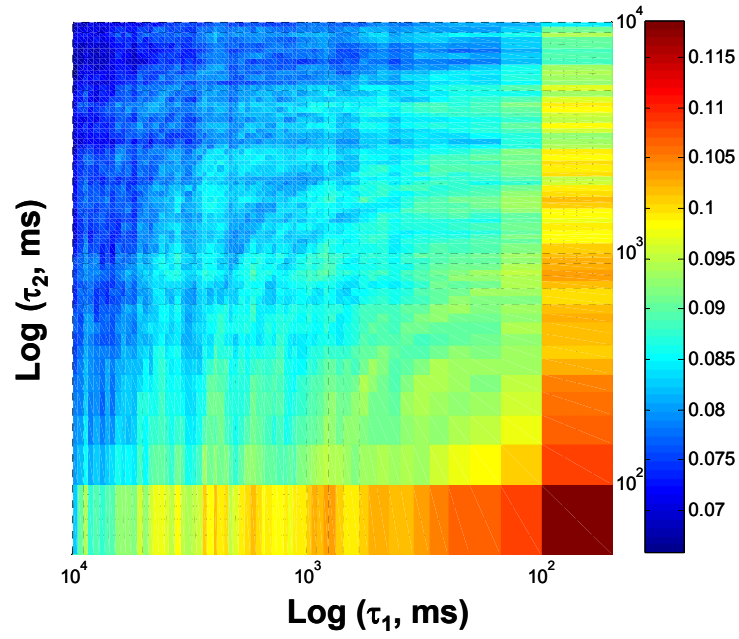

**Figure S2. Cyclic mechanism for channels with bursting/non-bursting states.** (a) Rate constants violating detailed balance:  $k_{12} \times k_{23} \times k_{34} \times k_{41} \gg k_{14} \times k_{43} \times k_{32} \times k_{21}$ . (b) Rate constants satisfying detailed balance:  $k_{12} \times k_{23} \times k_{34} \times k_{41} = k_{14} \times k_{43} \times k_{32} \times k_{21}$ .

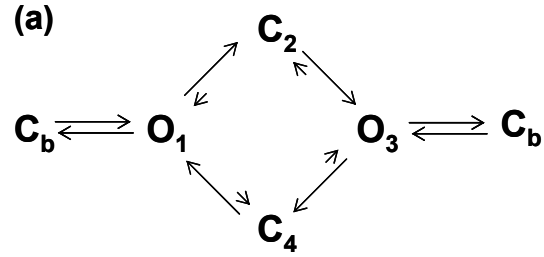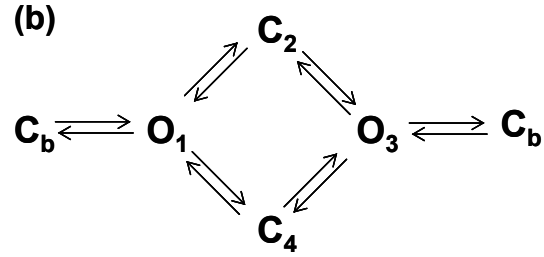

**Figure S3. Third-order correlation functions from simulated records.** (a) Simulated records with the violations of detailed balance show  $G_2 - G_2^T$  of  $0.01 \pm 0.001$  ( $N = 5$ , S.E.M.). (b) Simulated records for a gating reaction at equilibrium have  $G_2 - G_2^T$  of  $0.006 \pm 0.001$  ( $N = 5$ , S.E.M.).

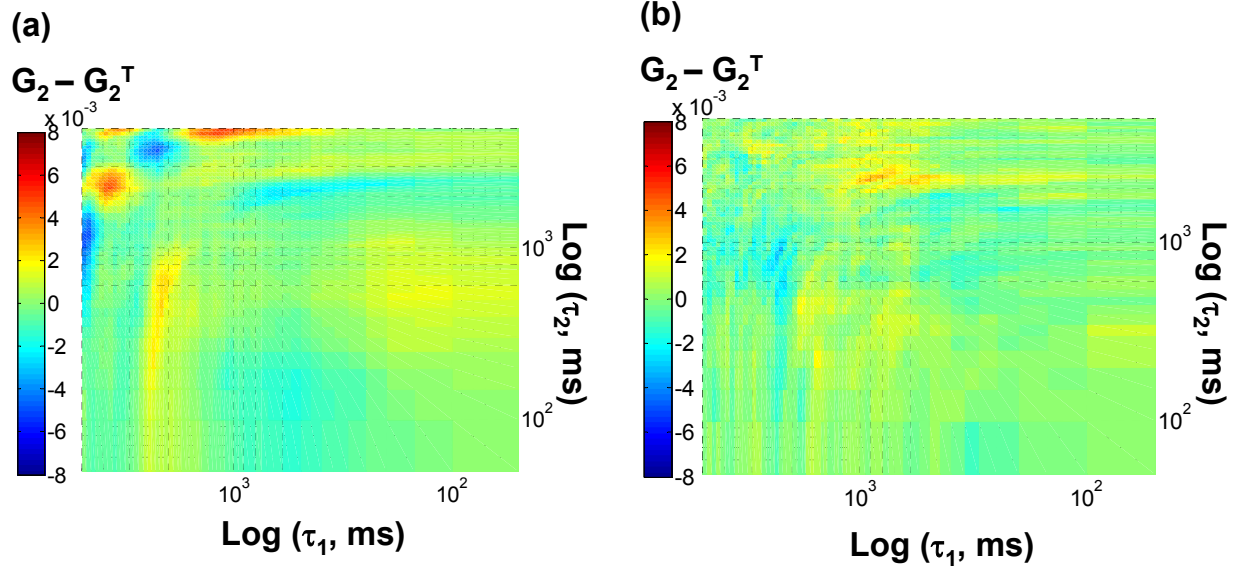

**Figure S4. Kinetic identifiability in detection of microscopic reversibility violations.** (a) A cyclic mechanism with three different bursting states. (b) The open probabilities shift from low to medium to high, and then back to low. (c) The third-order correlation function is asymmetric.

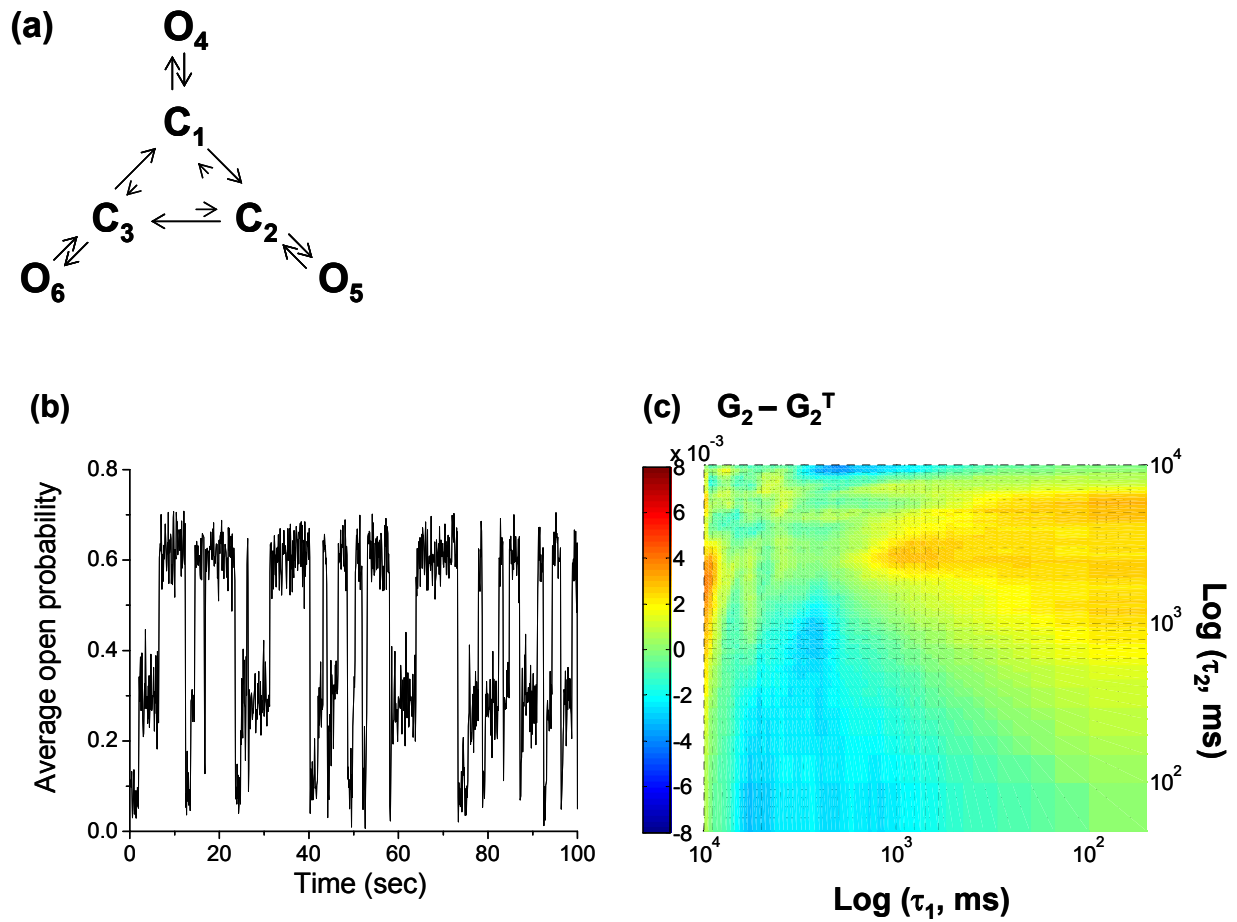

**Figure S5. Only two kinetically identifiable bursting states.** The asymmetric third-order correlation function is observed when only two of the bursting states exhibit different open probabilities.

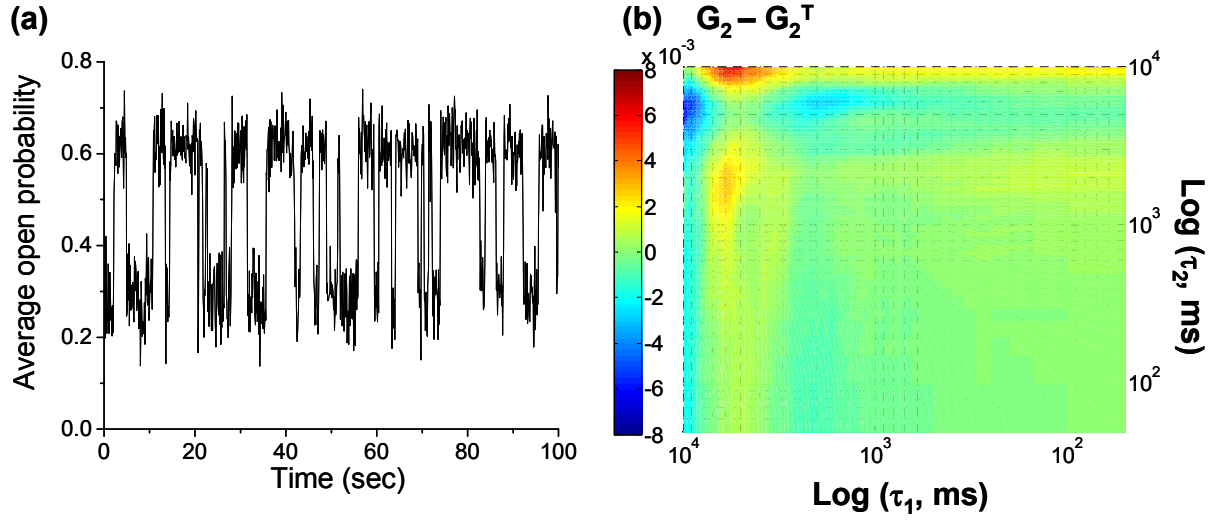



**Figure S6. A kinetically non-identifiable and non-equilibrium cyclic mechanism.** (a) The open probability does not vary with time. (b) The third-order correlation function is symmetric.

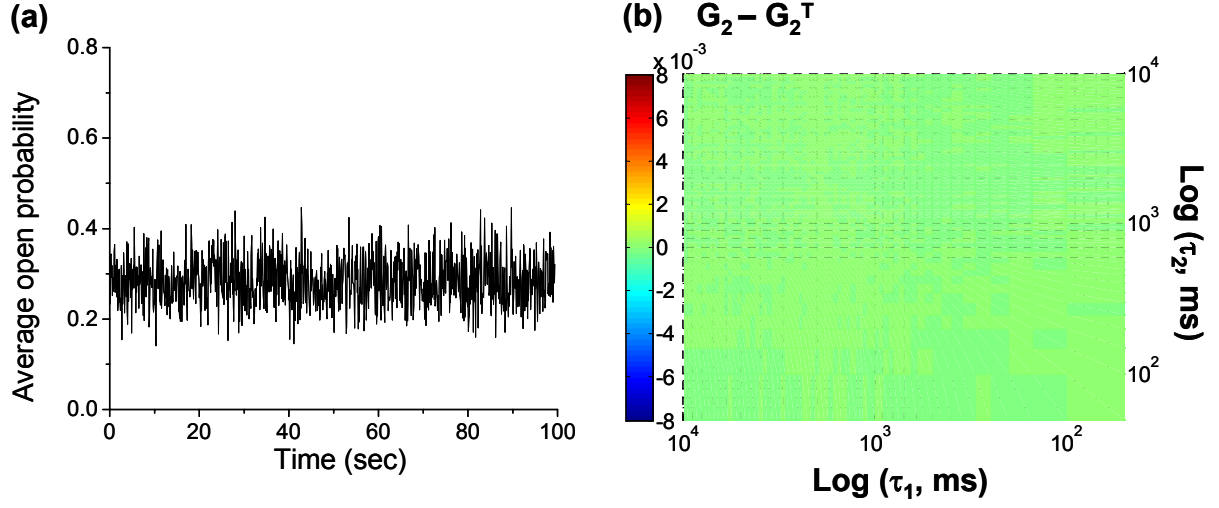

Supplement: Supplementary file 1 [file 4617445]
